# Supplementary material for: Breaking and joining single-stranded DNA: the HUH endonuclease superfamily
Source: Springer Nature journal article supplement (doi:10.1038/nrmicro3067), 2013-07-08
Supplement: 41579_2013_BFnrmicro3067_MOESM16_ESM.pdf [file 41579_2013_BFnrmicro3067_MOESM16_ESM.pdf]

Supplementary information S1 (table) | Major features of HUH enzymes

|      | Group    | Protein (element)  | Ys           | HUH | Biochemistry                                                                                                          | Structure                                                                  |
|------|----------|--------------------|--------------|-----|-----------------------------------------------------------------------------------------------------------------------|----------------------------------------------------------------------------|
| Reps | Phages   | GpA ( $\phi$ X174) | Y343<br>Y347 | yes | Y343 and Y347 involved (Van Mansfeld <i>et al.</i> , 1986)<br>Flip-flop mechanism (Hanai and Wang, 1993)              | NO                                                                         |
|      |          | A (P2)             | Y454<br>Y450 | yes | Initiation (Y454) and termination (Y450) Tyr are different (Odegrip and Haggård-Ljungquist, 2001)                     | NO                                                                         |
|      |          | GpII (M13)         | Y197         | no  | No stable covalent complex (Asano <i>et al.</i> , 1999)                                                               | NO                                                                         |
|      |          | SIRV1 Rep          | Y108         | yes | Stable covalent complex (Oke <i>et al.</i> , 2011)                                                                    | 2X3G (Oke <i>et al.</i> , 2011) dimer                                      |
|      | Viruses  | Rep (AAV5)         | Y156         | yes | Site-specific endonuclease activity (Im and Muzyczka, 1990)                                                           | 1M55 (Hickman <i>et al.</i> , 2002)<br>1RZ9 (Hickman <i>et al.</i> , 2004) |
|      |          | Rep (TYLCV)        | Y103         | yes | Cleavage and joining domain (Heyraud-Nitschke <i>et al.</i> , 1995)                                                   | 1L2V (Campos-Olivas <i>et al.</i> , 2002)                                  |
|      |          | Rep (FBNYV)        | Y79          | HUQ | In vitro endonuclease activity (Vega-Rocha <i>et al.</i> , 2007b)                                                     | 2HWT (Vega-Rocha <i>et al.</i> , 2007b)                                    |
|      |          | Rep (PCV)          | Y96          | HUQ | In vitro endonuclease activity (Vega-Rocha <i>et al.</i> , 2007a)                                                     | 2HW0 (Vega-Rocha <i>et al.</i> , 2007a)                                    |
|      | Plasmids | RepB pMV158        | Y99          | Yes | Chiral phosphorothioate (Moscoso <i>et al.</i> , 1997)                                                                | 3DKY (Boer <i>et al.</i> , 2009)                                           |
|      |          | RepA pC194         | Y214<br>E210 | yes | Termination hydrolysis by Glu (Noirot-Gros <i>et al.</i> , 1994) Flip-flop with E210Y (Noirot-Gros and Ehrlich, 1996) | NO                                                                         |

|                  |                             | RepC pT181     | Y191             | No                                                         | Short oligonucleotide inactivation (Rasooly and Novick, 1993)                                                                                                                                                                                                           | NO                                   |
|------------------|-----------------------------|----------------|------------------|------------------------------------------------------------|-------------------------------------------------------------------------------------------------------------------------------------------------------------------------------------------------------------------------------------------------------------------------|--------------------------------------|
| <b>Mobs</b>      | MOB <sub>F</sub>            | TrwC (R388)    | Y18 Y26          | yes                                                        | Initiation and termination Tyr (Grandoso <i>et al.</i> , 2000) Intramolecular reaction (Gonzalez-Perez <i>et al.</i> , 2007) TrwC transfer to the recipient (Draper <i>et al.</i> , 2005) Termination reaction in the recipient (Garcillán-Barcia <i>et al.</i> , 2007) | 1OMH (Guasch <i>et al.</i> , 2003)   |
|                  |                             | Tral (F)       | Y16 Y17          |                                                            | Two contiguous catalytic Tyr (Street <i>et al.</i> , 2003) Differential metal affinity (Larkin <i>et al.</i> , 2005)                                                                                                                                                    | 1P4D, (Datta <i>et al.</i> , 2003)   |
|                  |                             | Tral (pCU1)    | Y18-19<br>Y26-27 | yes                                                        | Tyrosine partners (Nash <i>et al.</i> , 2011)                                                                                                                                                                                                                           | 3L57 (Nash <i>et al.</i> , 2010)     |
|                  | MOB <sub>Q</sub>            | MobA (RSF1010) | Y25              | yes                                                        | In vitro SC and SS DNA cleavage (Scherzinger <i>et al.</i> , 1992)                                                                                                                                                                                                      | 2NS6 (Monzingo <i>et al.</i> , 2007) |
|                  | MOB <sub>P</sub>            | Tral (RP4)     | Y22              | Yes                                                        | Three motifs (Pansegrau <i>et al.</i> , 1994)                                                                                                                                                                                                                           | NO                                   |
|                  |                             | MbeA (ColE1)   | Y19              | HEN                                                        | Divergent HUH motif (Varsaki <i>et al.</i> , 2003)                                                                                                                                                                                                                      | NO                                   |
|                  | MOB <sub>V</sub>            | MobM (pMV158)  | ?                | yes                                                        | In vitro relaxase activity (Guzmán and Espinosa, 1997)                                                                                                                                                                                                                  | NO                                   |
|                  | MOB <sub>C</sub>            | MobC (CloDF13) | ?                | No                                                         | No covalent complex (Núñez and De La Cruz, 2001)                                                                                                                                                                                                                        | NO                                   |
| MOB <sub>H</sub> | Tral (Neisseria chromosome) | Y93<br>Y201    | HHH              | Covalent intermediate (Salgado-Pabón <i>et al.</i> , 2007) | NO                                                                                                                                                                                                                                                                      |                                      |

|         |                     |                                                       |      |     |                                                        |                                                                                                                                                                                                          |
|---------|---------------------|-------------------------------------------------------|------|-----|--------------------------------------------------------|----------------------------------------------------------------------------------------------------------------------------------------------------------------------------------------------------------|
| Tpsases | TnpA                | IS608<br>( <i>H. pylori</i> )                         | Y127 | HUH | Covalent intermediate (Ton-Hoang <i>et al.</i> , 2005) | 2A6M, 2A6O (Ronning <i>et al.</i> , 2005) dimer<br>2VIH (TnpA/LE26), 2VIC (TnpA/LE26+Mn <sup>2+</sup> ), 2VHG (TnpA/RE31), 2VJU (TnpA/RE35) and 2VJV (TnpA/LE26/D6) (Barabas <i>et al.</i> , 2008) dimer |
|         | TnpA                | ISDra2<br>( <i>D. radiodurans</i> )                   | Y132 | HUH | Covalent intermediate (Hickman <i>et al.</i> , 2010)   | 2XM3 (TnpA/LE27/T5), 2XMA (TnpA/RE34), 2XO6 (TnpA/Cd) and 2XQC (TnpA/Zn) (Hickman <i>et al.</i> , 2010) dimer                                                                                            |
|         |                     | IS1476<br>( <i>S. solfataricus</i> )<br>Incomplete IS | ?    | HUH |                                                        | ISfinder <i>S. solfataricus</i> genome<br>2F4F, 2F5G (Lee <i>et al.</i> , 2006) dimer                                                                                                                    |
| REP     | TnpA <sub>REP</sub> | E.coli                                                |      | HUH | Covalent intermediate (Ton Hoang <i>et al.</i> , 2012) | (Messing <i>et al.</i> , 2012) monomer                                                                                                                                                                   |
|         | Tpase               | IS91                                                  |      | HUH |                                                        | NO                                                                                                                                                                                                       |
|         | Tpase               | ISCR                                                  |      | HUH |                                                        | NO                                                                                                                                                                                                       |

## REFERENCES

- Asano, S., Higashitani, A., and Horiuchi, K. (1999). Filamentous phage replication initiator protein gpII forms a covalent complex with the 5' end of the nick it introduced. *Nucl. Acids Res.* 27, 1882–1889.
- Barabas, O., Ronning, D.R., Guynet, C., Hickman, A.B, Ton-Hoang, B., Chandler, M. and Dyda, F. (2008). Mechanism of IS200/IS605 family DNA transposases: activation and transposon-directed target site selection. *Cell* 132, 208–220.
- Boer, D.R., Ruíz-Masó, J.A., López-Blanco, J.R., Blanco, A.G., Vives-Llàcer, M., Chacón, P., Usón, I., Gomis-Rüth, F.X., Espinosa, M., Llorca, O., *et al.* (2009). Plasmid replication initiator RepB forms a hexamer reminiscent of ring helicases and has mobile nuclease domains. *EMBO J.* 28, 1666–1678.

- Campos-Olivas, R., Louis, J.M., Clerot, D., Gronenborn, B., and Gronenborn, A.M. (2002). The structure of a replication initiator unites diverse aspects of nucleic acid metabolism. *Proc. Natl. Acad. Sci. U.S.A.* 99, 10310–10315.
- Datta, S., Larkin, C., and Schildbach, J.F. (2003). Structural insights into single-stranded DNA binding and cleavage by F factor Tral. *Structure* 11, 1369–1379.
- Draper, O., César, C.E., Machón, C., De la Cruz, F., and Llosa, M. (2005). Site-specific recombinase and integrase activities of a conjugative relaxase in recipient cells. *Proc. Natl. Acad. Sci. U.S.A.* 102, 16385–16390.
- Garcillán-Barcia, M.P., Jurado, P., González-Pérez, B., Moncalián, G., Fernández, L.A., and De la Cruz, F. (2007). Conjugative transfer can be inhibited by blocking relaxase activity within recipient cells with intrabodies. *Mol. Microbiol.* 63, 404–416.
- Gonzalez-Perez, B., Lucas, M., Cooke, L.A., Vyle, J.S., De la Cruz, F., and Moncalián, G. (2007). Analysis of DNA processing reactions in bacterial conjugation by using suicide oligonucleotides. *EMBO J.* 26, 3847–3857.
- Grandoso, G., Avila, P., Cayón, A., Hernando, M.A., Llosa, M., and De la Cruz, F. (2000). Two active-site tyrosyl residues of protein TrwC act sequentially at the origin of transfer during plasmid R388 conjugation. *J. Mol. Biol.* 295, 1163–1172.
- Guasch, A., Lucas, M., Moncalián, G., Cabezas, M., Pérez-Luque, R., Gomis-Rüth, F.X., De la Cruz, F., and Coll, M. (2003). Recognition and processing of the origin of transfer DNA by conjugative relaxase TrwC. *Nat. Struct. Biol.* 10, 1002–1010.
- Guzmán, L.M., and Espinosa, M. (1997). The mobilization protein, MobM, of the streptococcal plasmid pMV158 specifically cleaves supercoiled DNA at the plasmid oriT. *J. Mol. Biol.* 266, 688–702.
- Hanai, R., and Wang, J.C. (1993). The mechanism of sequence-specific DNA cleavage and strand transfer by phi X174 gene A\* protein. *J. Biol. Chem.* 268, 23830–23836.
- Heyraud-Nitschke, F., Schumacher, S., Laufs, J., Schaefer, S., Schell, J., and Gronenborn, B. (1995). Determination of the origin cleavage and joining domain of geminivirus Rep proteins. *Nucleic Acids Res.* 23, 910–916.
- Hickman, A.B., Ronning, D.R., Kotin, R.M., and Dyda, F. (2002). Structural unity among viral origin binding proteins: crystal structure of the nuclease domain of adeno-associated virus Rep. *Mol. Cell* 10, 327–337.
- Hickman, A.B., Ronning, D.R., Perez, Z.N., Kotin, R.M., and Dyda, F. (2004). The nuclease domain of adeno-associated virus rep coordinates replication initiation using two distinct DNA recognition interfaces. *Mol. Cell* 13, 403–414.
- Im, D.S., and Muzyczka, N. (1990). The AAV origin binding protein Rep68 is an ATP-dependent site-specific endonuclease with DNA helicase activity. *Cell* 61, 447–457.
- Larkin, C., Datta, S., Harley, M.J., Anderson, B.J., Ebie, A., Hargreaves, V., and Schildbach, J.F. (2005). Inter- and Intramolecular Determinants of the Specificity of Single-Stranded DNA Binding and Cleavage by the F Factor Relaxase. *Structure* 13, 1533–1544.
- Lee, H.H., Yoon, J.Y., Kim, H.S., Kang, J.Y., Kim, K.H., Kim, D.J., Ha, J.Y., Mikami, B., Yoon, H.J. and Suh, S.W. Crystal Structure of a Metal Ion-bound IS200 Transposase. *J. Biol. Chem.* 281, 4261–4266.
- Van Mansfeld, A.D., Van Teeffelen, H.A., Baas, P.D., and Jansz, H.S. (1986). Two juxtaposed tyrosyl-OH groups participate in phi X174 gene A protein catalysed cleavage and ligation of DNA. *Nucleic Acids Res.* 14, 4229–4238.
- Monzingo, A.F., Ozburn, A., Xia, S., Meyer, R.J., and Robertus, J.D. (2007). The Structure of the Minimal Relaxase Domain of MobA at 2.1 Å Resolution. *J Mol Biol* 366, 165–178.
- Moscoso, M., Eritja, R., and Espinosa, M. (1997). Initiation of replication of plasmid pMV158: mechanisms of DNA strand-transfer reactions mediated by the initiator RepB protein. *J. Mol. Biol.* 268, 840–856.

- Nash, R.P., Habibi, S., Cheng, Y., Lujan, S.A., and Redinbo, M.R. (2010). The mechanism and control of DNA transfer by the conjugative relaxase of resistance plasmid pCU1. *Nucleic Acids Res.* 38, 5929–5943.
- Nash, R.P., Niblock, F.C., and Redinbo, M.R. (2011). Tyrosine partners coordinate DNA nicking by the *Salmonella typhimurium* plasmid pCU1 relaxase enzyme. *FEBS Lett.* 585, 1216–1222.
- Noirot-Gros, M.F., Bidnenko, V., and Ehrlich, S.D. (1994). Active site of the replication protein of the rolling circle plasmid pC194. *EMBO J.* 13, 4412–4420.
- Noirot-Gros, M.F., and Ehrlich, S.D. (1996). Change of a catalytic reaction carried out by a DNA replication protein. *Science* 274, 777–780.
- Núñez, B., and De La Cruz, F. (2001). Two atypical mobilization proteins are involved in plasmid CloDF13 relaxation. *Molecular Microbiology* 39, 1088–1099.
- Odegrip, R., and Haggård-Ljungquist, E. (2001). The two active-site tyrosine residues of the  $\alpha$  protein play non-equivalent roles during initiation of rolling circle replication of bacteriophage  $\phi$ 2. *J. Mol. Biol.* 308, 147–163.
- Pansegrau, W., Schröder, W., and Lanka, E. (1994). Concerted action of three distinct domains in the DNA cleaving-joining reaction catalyzed by relaxase (Tral) of conjugative plasmid RP4. *J. Biol. Chem.* 269, 2782–2789.
- Rasooly, A., and Novick, R.P. (1993). Replication-specific inactivation of the pT181 plasmid initiator protein. *Science* 262, 1048–1050.
- Salgado-Pabón, W., Jain, S., Turner, N., Van der Does, C., and Dillard, J.P. (2007). A novel relaxase homologue is involved in chromosomal DNA processing for type IV secretion in *Neisseria gonorrhoeae*. *Mol Microbiol* 66, 930–947.
- Scherzinger, E., Lurz, R., Otto, S., and Dobrinski, B. (1992). In vitro cleavage of double- and single-stranded DNA by plasmid RSF1010-encoded mobilization proteins. *Nucleic Acids Res.* 20, 41–48.
- Street, L.M., Harley, M.J., Stern, J.C., Larkin, C., Williams, S.L., Miller, D.L., Dohm, J.A., Rodgers, M.E., and Schildbach, J.F. (2003). Subdomain organization and catalytic residues of the F factor Tral relaxase domain. *Biochimica Et Biophysica Acta (BBA) - Proteins and Proteomics* 1646, 86–99.
- Varsaki, A., Lucas, M., Afendra, A.S., Drainas, C., and De la Cruz, F. (2003). Genetic and biochemical characterization of MbeA, the relaxase involved in plasmid ColE1 conjugative mobilization. *Mol. Microbiol.* 48, 481–493.
- Vega-Rocha, S., Byeon, I.-J.L., Gronenborn, B., Gronenborn, A.M., and Campos-Olivas, R. (2007a). Solution Structure, Divalent Metal and DNA Binding of the Endonuclease Domain from the Replication Initiation Protein from Porcine Circovirus 2. *Journal of Molecular Biology* 367, 473–487.
- Vega-Rocha, S., Gronenborn, B., Gronenborn, A.M., and Campos-Olivas, R. (2007b). Solution Structure of the Endonuclease Domain from the Master Replication Initiator Protein of the Nanovirus Faba Bean Necrotic Yellows Virus and Comparison with the corresponding Geminivirus and Circovirus Structures. *Biochemistry* 46, 6201–6212.
